# Supplementary material for: RNA-Bloom enables reference-free and reference-guided sequence assembly for single-cell transcriptomes
Source: HighWire-hosted journal article supplement (doi:10.1101/gr.260174.119), 2020-08-01
Supplement: Supplemental_Material.docx [file Supplemental_Material.docx]

**RNA-Bloom enables reference-free and reference-guided sequence assembly for single-cell transcriptomes**

Ka Ming Nip1, Readman Chiu1, Chen Yang1, Justin Chu1, Hamid Mohamadi1, René L. Warren1, and Inanc Birol1,2

1 Canada’s Michael Smith Genome Sciences Centre, BC Cancer, Vancouver, BC, Canada

2 Department of Medical Genetics, University of British Columbia, Vancouver, BC, Canada

**SUPPLEMENTAL MATERIAL**

[**Supplemental Figure S1. Pooling of reads from multiple cells.**](#_yjfmil2zsiv2) **2**

[**Supplemental Figure S2. Assembly quality on mouse simulated bulk RNA-seq data.**](#_fw11cpn4mz4) **3**

[**Supplemental Figure S3. Assembly quality on mouse simulated and real bulk RNA-seq data.**](#_vjpuxrmm2gey) **4**

[**Supplemental Figure S4. Assembly quality on simulated data for 384 mouse microglia cells.**](#_me9zqtdgdkzf) **5**

[**Supplemental Figure S5. Assembly quality on real data for 260 mouse embryonic stem cells.**](#_5f7830dsr7xi) **6**

[**Supplemental Figure S6. Splice variants of the *TREM2* gene in mouse reference genome GRCm38.**](#_zelcdsvfg6ke) **7**

[**Supplemental Figure S7. Paired *k*-mers along reads and reconstructed fragments.**](#_jff7izguldb0) **7**

[**Supplemental Figure S8. Error correction in paired-end reads.**](#_pvwx5otyxbw6) **8**

[**Supplemental Figure S9. *K*-mer pairs spanning candidate extensions.**](#_lietv7g2g0ws) **9**

[**Supplemental Figure S10. Stratification of reconstructed fragments and unconnected reads.**](#_4r9i80jadxyi) **9**

**
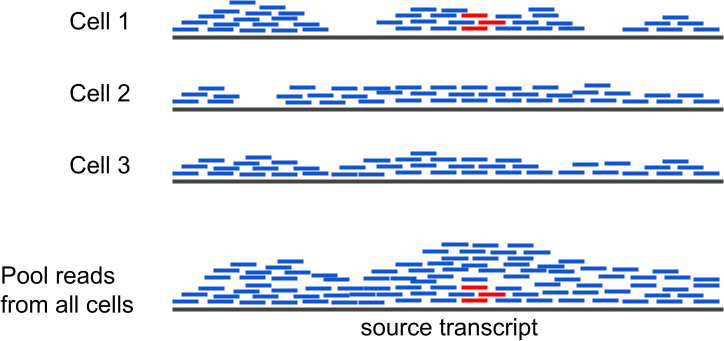
**

### Supplemental Figure S1. Pooling of reads from multiple cells.

Transcript sequence reconstruction can be improved by pooling reads to fill in sequencing gaps and distinguish between noise and signal.

**
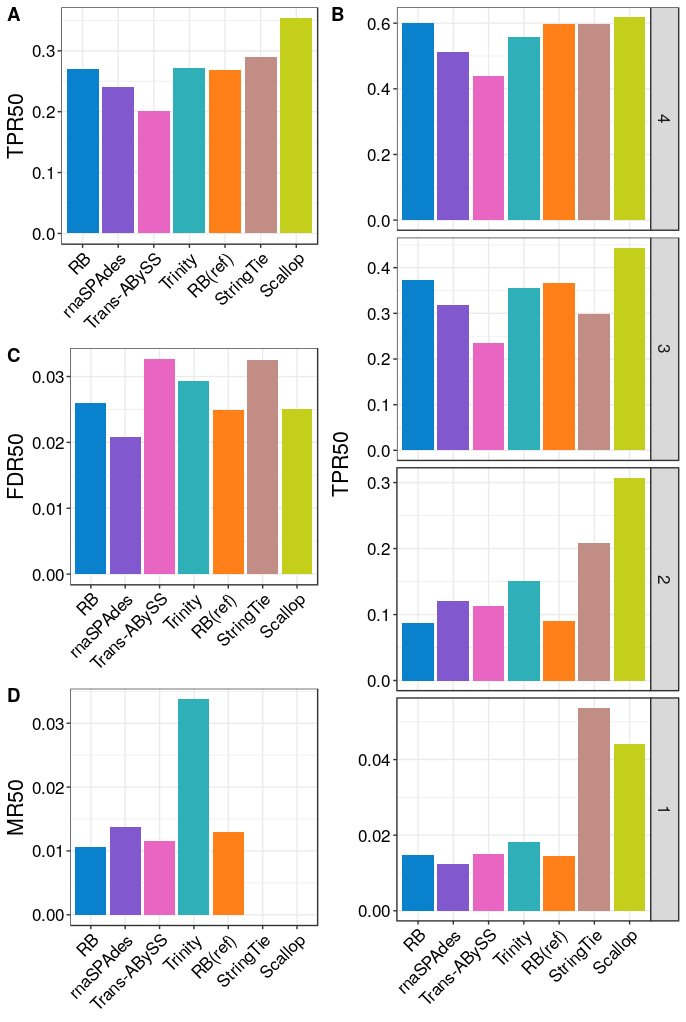
**

### Supplemental Figure S2. Assembly quality on mouse simulated bulk RNA-seq data.

(*A*) True positive rate calculated based on isoforms reconstructed to at least 50% of annotated length; denoted as “TPR50”. (*B*) True positive rate at four transcript expression strata. Isoforms in strata 1, 2, 3, and 4 have non-zero values of transcripts per million (TPM) in the lowest quartile, second-lowest quartile, second-highest quartile, and the highest quartile, respectively. (*C*) False discovery rate calculated based on I50; denoted as “FDR50”. (*D*) Misassembly rate calculated based on I50; denoted as “MR50”.

**
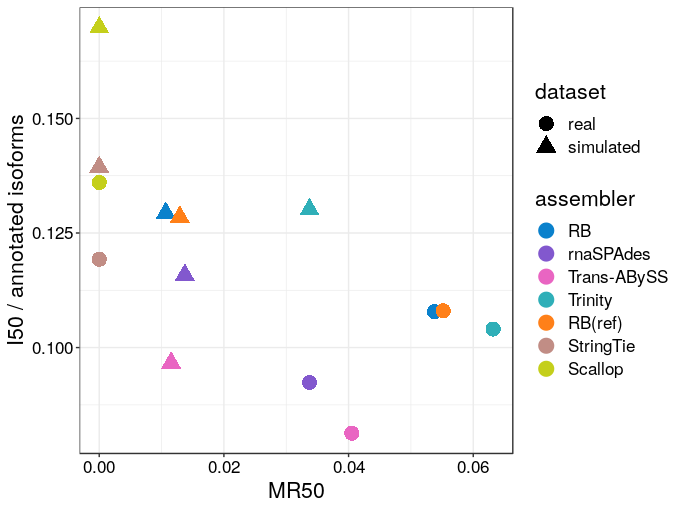
**

### Supplemental Figure S3. Assembly quality on mouse simulated and real bulk RNA-seq data.

Assembly sensitivity was measured as the number of isoforms reconstructed to at least 50% annotated isoform length (denoted as “I50”) in each dataset normalized by the total number of isoforms in reference annotation. Misassembly rate was calculated based on I50; denoted as “MR50”.

**
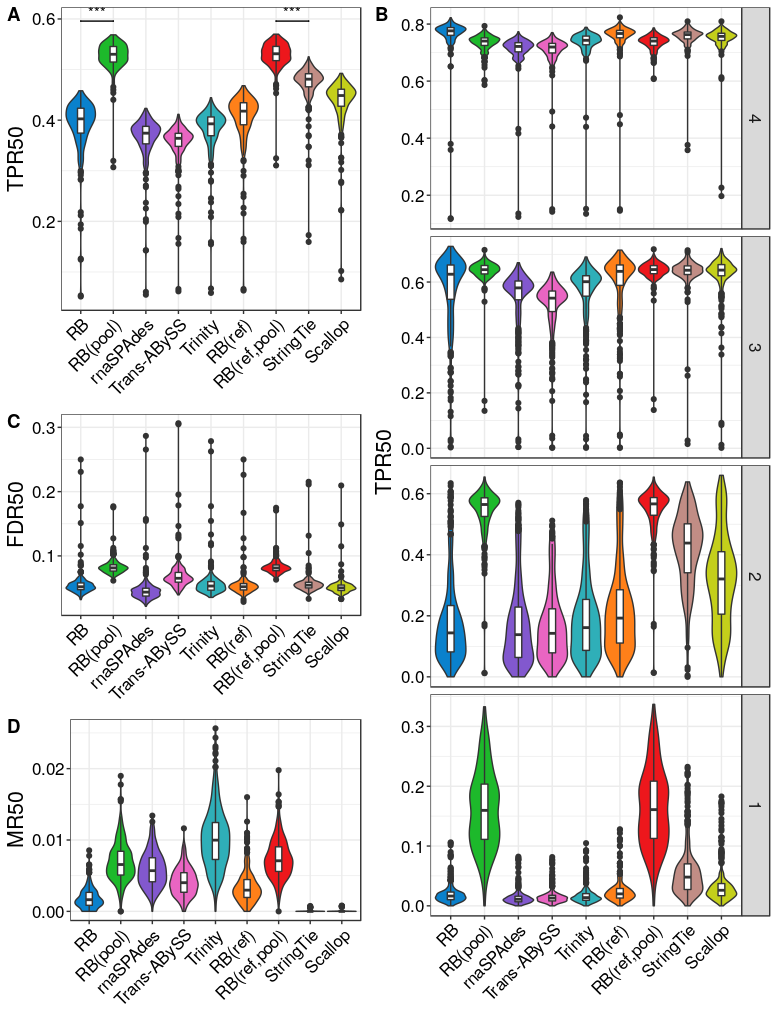
**

### Supplemental Figure S4. Assembly quality on simulated data for 384 mouse microglia cells.

(*A*) True positive rate calculated based on isoforms reconstructed to at least 50% of annotated length; denoted as “TPR50”. (*B*) True positive rate at different transcript expression stratum. (*C*) False discovery rate calculated based on isoforms reconstructed to at least 50% of annotated length; denoted as “FDR50”. (*D*) Misassembly rate calculated based on isoforms reconstructed to at least 50% of annotated length; denoted as “MR50”. The comparison bars on top between RB(pool) and RB(ref,pool) and the next best performer in each class indicate statistical significance of the difference between distributions at p<0.001 (“***”) or no significance (“NS.”) using the Wilcoxon test.

**
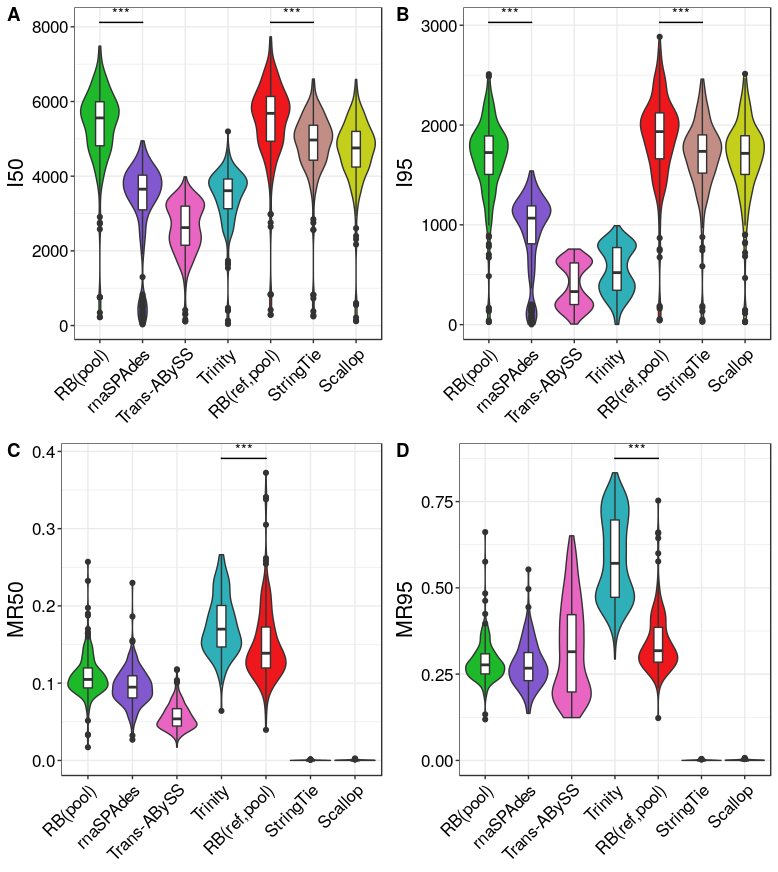
**

### Supplemental Figure S5. Assembly quality on real data for 260 mouse embryonic stem cells.

The comparison bars indicate statistical significance of the difference between distributions at p<0.001 (“***”).

**
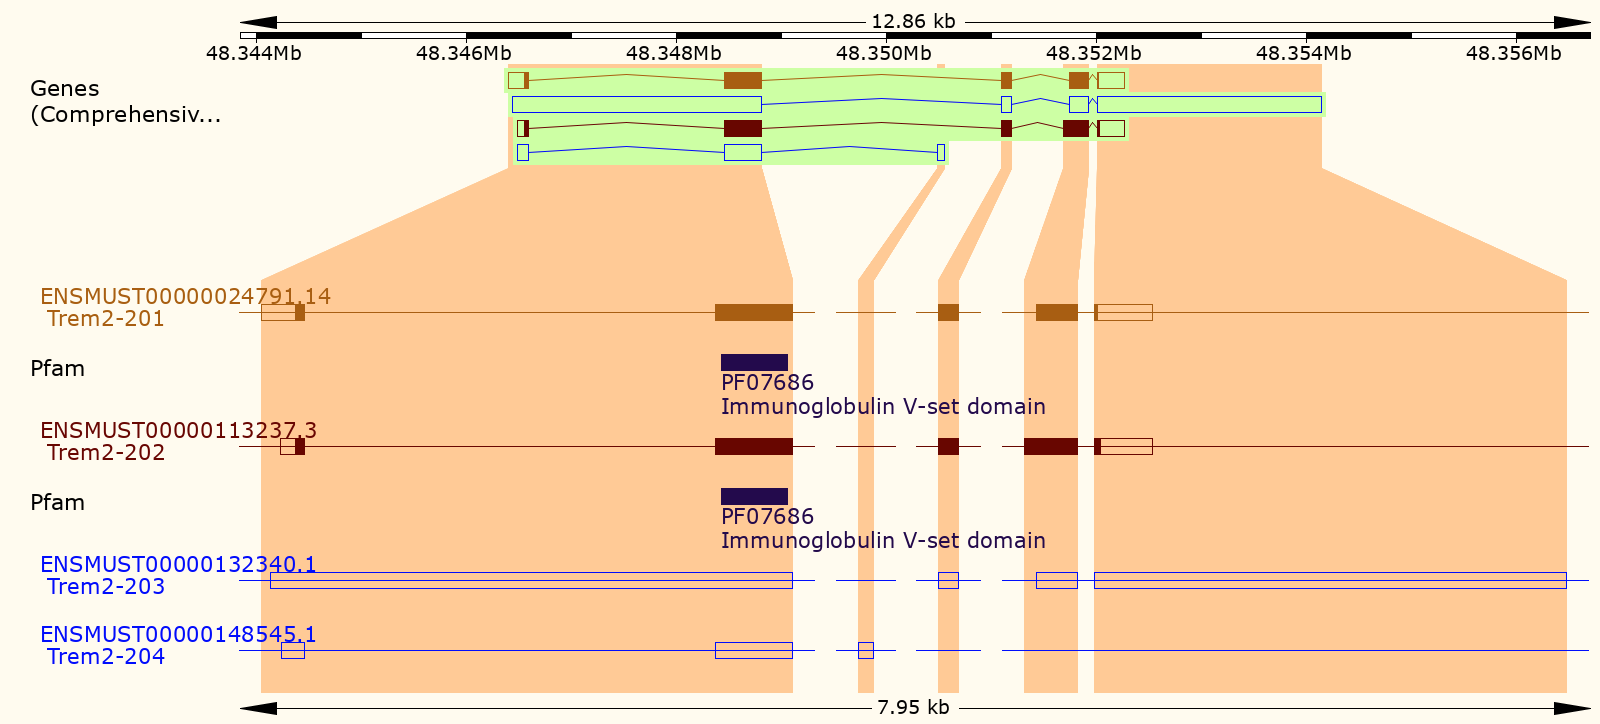
**

### Supplemental Figure S6. Splice variants of the *TREM2* gene in mouse reference genome GRCm38.

Screenshot was taken from Ensembl Genome Browser (release 99).


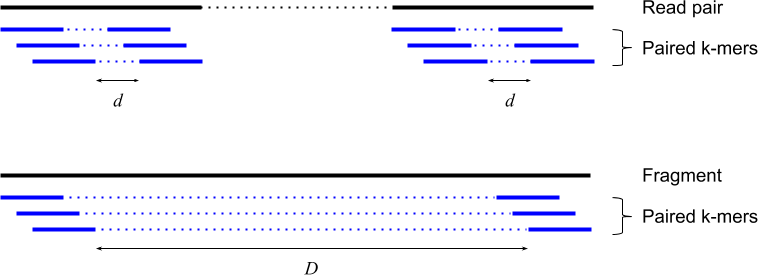


### Supplemental Figure S7. Paired *k*-mers along reads and reconstructed fragments.

Paired *k*-mers are sparse representations of the sequences that they were derived from. This is analogous to a read pair being a sparse representation of its underlying fragment. The distance between read paired *k*-mers (ie. *d*) is set based on the read length and it is the same for all cells. The distance between fragment paired *k*-mers (ie. *D*) is set based on the first quartile fragment length for each cell.


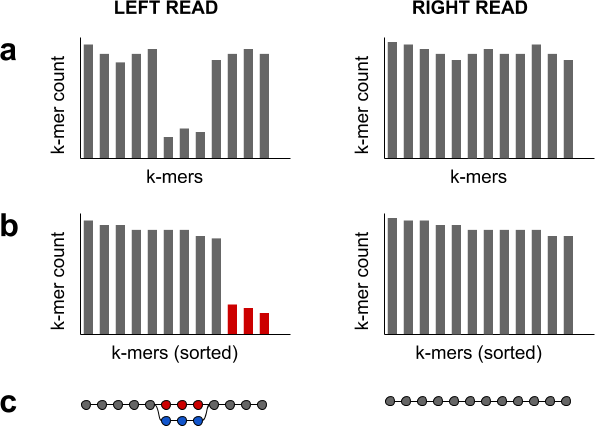


### Supplemental Figure S8. Error correction in paired-end reads.

(a) Errors in paired-end reads are corrected based on *k*-mer counts. (b) A local *k*-mer count threshold is determined for each read individually. This is done by sorting the *k*-mer counts in descending order and then looking for the first sharp decrease (ie. ≥ 50%), where the *k*-mer count at the sharp decrease is set as the local *k*-mer count threshold. If there is no sharp decrease in *k*-mer counts, then the read would not be corrected. If both reads have their own local threshold, then the lower threshold is set for both reads to account for low-expressed alternative isoforms. (c) *K*-mers with counts lower than the threshold are marked (ie. red nodes) for replacement with an alternative branch (ie. blue nodes) in the DBG that has a higher median *k*-mer count, similar length, and high sequence identity (ie. ≥ 90%).

**
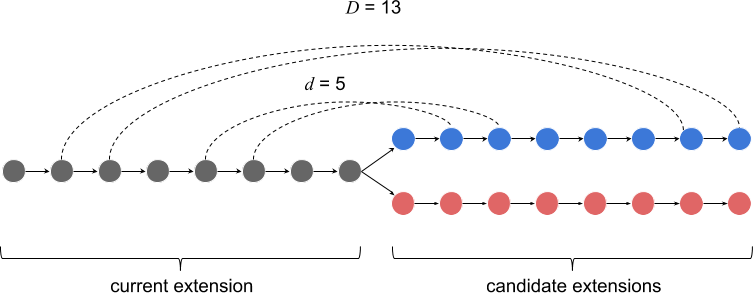
**

### Supplemental Figure S9. *K*-mer pairs spanning candidate extensions.

When the current extension has reached a fork in the de Bruijn graph, *k*-mer pairs from reads and fragments are used to identify the best candidate extension from the branching point. In this example, read paired *k*-mers have a distance (*d*) of 5 and fragment paired *k*-mers have a distance (*D*) of 13. The blue top branch is a better candidate extension compared to the red bottom branch because it has 2 supporting read *k*-mer pairs and 2 supporting fragment *k*-mer pairs.


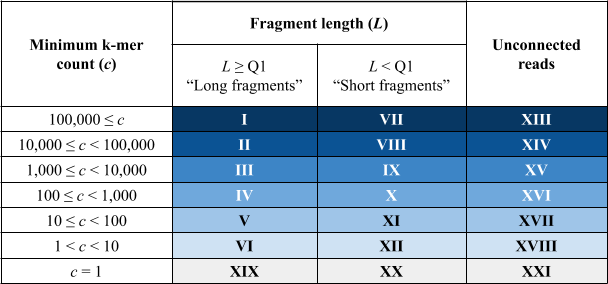


### Supplemental Figure S10. Stratification of reconstructed fragments and unconnected reads.

Reconstructed fragments are stratified according to its length and minimum *k*-mer count. Since the fragment paired *k*-mers distance is set based on the first quartile fragment length, “long” fragments have at least one fragment *k*-mer pair while “short” fragments do not. Unconnected reads are stratified according to their minimum *k*-mer count only. The stratum IDs (roman numerals in the table) denotes the order in which the fragments are retrieved for extension into transcript sequences. Sequences with singleton *k*-mers (ie. *c* = 1) are extended last because they often have sequencing artifacts.
