# Supplementary material for: RNA-Bloom enables reference-free and reference-guided sequence assembly for single-cell transcriptomes
Source: HighWire-hosted journal article supplement (doi:10.1101/gr.260174.119), 2020-08-01
Supplement: Supplemental_Methods.docx [file Supplemental_Methods.docx]

**RNA-Bloom enables reference-free and reference-guided sequence assembly for single-cell transcriptomes**

Ka Ming Nip1, Readman Chiu1, Chen Yang1, Justin Chu1, Hamid Mohamadi1, René L. Warren1, and Inanc Birol1,2

1 Canada’s Michael Smith Genome Sciences Centre, BC Cancer, Vancouver, BC, Canada

2 Department of Medical Genetics, University of British Columbia, Vancouver, BC, Canada

**SUPPLEMENTAL METHODS**

[**Finding Smart-seq2 and SMARTer datasets on GEO**](#_6yopdo6zcwuk) **2**

[**Procedure for assembly evaluation**](#_m4q89ugogwig) **2**

[**Assembly evaluation metrics**](#_b7rcyf8o70rh) **2**

[**Cell precision of single-cell assemblies**](#_f1rnbmv7xapy) **3**

[**Procedure for bulk RNA-seq data simulation**](#_aw0fws5hc7pw) **3**

[**Procedure for single-cell RNA-seq data simulation**](#_m4q89ugogwig) **4**

[**Clustering of cells based on isoform reconstruction levels**](#_s112564zqxs8) **4**

[**Heuristic score for selecting the best candidate extension.**](#_frrff9kr5r5z) **4**

[**Assembly commands**](#_vdjnzuu9wp42) **5**

###

### **Finding Smart-seq2 and SMARTer datasets on GEO**

1. Go to the NCBI database for GEO datasets:

<https://www.ncbi.nlm.nih.gov/gds>

2. Enter the following search query:

(Smart-seq2[All Fields] OR Smarter[All Fields]) AND gds_sra[filter] AND single-cell[All Fields]

### **Procedure for assembly evaluation**

We used rnaQUAST v1.5.2 to assess assembly quality using the mouse reference genome GRCm38 and Ensembl 99 annotation. The command to run rnaQUAST is as follows:

python rnaQUAST.py \

-t 8 -o OUTDIR \

-r REFERENCE_GENOME.fasta --gene_db REFERENCE_GENOME.db \

--gmap_index GMAP_INDEX \

--disable_infer_genes --disable_infer_transcripts --no_plots \

-c ASSEMBLY_1.fasta ASSEMBLY_2.fasta ... \

-l ASSEMBLY_1 ASSEMBLY_2 ...

### **Assembly evaluation metrics**

In simulated data, true positives are isoforms with TPM > 0 in the cell; false positives are annotated isoforms with TPM = 0 in the cell. In spiked-in data, true positives are a combined set of transcripts in ERCC and SIRV. In real data, true positives are all annotated isoforms.

*I50* and *I95* are the number of true positive isoforms reconstructed to at least 50% and 95% of annotated length as reported by rnaQUAST.

*TPR50* and *TPR95* are the true positive rates for isoforms reconstructed to at least 50% and 95%, respectively. Let *N* be the total number of isoforms simulated (with expression TPM > 0), the true positives rates are defined as:

*TDR50* = *I50* / *N*

*TDR95* = *I95* / *N*

*FP50* and *FP95* are the number of false positive isoforms reconstructed to at least 50% and 95% of annotated length as reported by rnaQUAST.

*FDR50* and *FDR95* are the false discovery rates for isoforms reconstructed to at least 50% and 95%, respectively. They are defined as:

*FDR50* = *FP50* / (*FP50* + *I50)*

*FDR95* = *FP95* / (*FP95* + *I95)*

*Misassemblies* is the number of incorrectly assembled sequences as reported by rnaQUAST.

*MR50* and *MR95* are the misassembly rates for isoforms reconstructed to at least 50% and 95%, respectively. They are defined as:

*MR50* = *Misassemblies* / (*Misassemblies* + *I50*)

*MR95* = *Misassemblies* / (*Misassemblies* + *I95*)

*S50* and *S95* are the number of spiked-in RNA controls reconstructed to at least 50% and 95% of annotated length as reported by rnaQUAST.

### **Cell precision of single-cell assemblies**

Cell precision is calculated based on the mathematical equation for precision:

precision = true positives / (true positives + false positives), where:

“true positives” are isoforms unique to this cell

“false positives” are isoforms unique to other cells but reconstructed for this cell

In particular, we only considered isoforms that have alternative isoforms with non-zero expression in the simulated dataset (ie. TPM > 0 according to RSEM simulation). Therefore, we filter out isoforms from single-isoform genes or genes that have one isoform simulated in the dataset. This is done to avoid overinflation of cell precision values that are close to 100%.

### **Procedure for bulk RNA-seq data simulation**

We simulated bulk RNA-seq data based on a real sample (ArrayExpress: ERR523093). First, we remove adaptors from the reads with fastp v0.20.0. Second, we used RSEM v1.3.1 to quantify the isoform expression. Finally, we simulated the same number of read pairs (70580891) at the same noise level (0.0271094191772048) as the real sample. The commands to run fastp and RSEM are as follows:

*(trim adaptors)*

fastp --disable_quality_filtering --detect_adapter_for_pe -l 25 \

--in1 ERR523093_1.fastq.gz --in2 ERR523093_2.fastq.gz \

--out1 fastp_1.fastq.gz --out2 fastp_2.fastq.gz \

--json fastp.json --html fastp.html

*(quantify isoform expression)*

rsem-calculate-expression -p 24 --paired-end \

--star --star-path STAR_PATH --star-gzipped-read-file \

--estimate-rspd --append-names --no-bam-output \

fastp_1.fastq.gz fastp_2.fastq.gz GRCm38 ERR523093

*(simulate reads)*

rsem-simulate-reads GRCm38 ERR523093.stat/ERR523093.model \

ERR523093.isoforms.results 0.0271094191772048 70580891 OUTDIR

### **Procedure for single-cell RNA-seq data simulation**

We simulated a scRNA-seq data of 384 cells based on a real sample of mouse microglia cells from Tabula Muris. We selected cells with at least 50000 read pairs because low read count would severely limit isoform reconstruction. We remove adaptors from the reads with fastp v0.20.0. Simulation of scRNA-seq data was based on a tutorial by the author of RSEM (<https://github.com/bli25broad/RSEM_tutorial>). We used RSEM v1.3.1 to quantify the isoform expression for each cell. Then, we simulated the same number of read pairs at the same noise level as each real cell. Doing so generated a dataset that would mimic the real dataset, which has a variable number of reads, a different noise level, and a different isoform expression profile for each cell. The commands to run fastp and RSEM for each cell are as follows:

*(trim adaptors)*

fastp --disable_quality_filtering --detect_adapter_for_pe -l 25 \

-g --adapter_fasta ADAPTERS.fasta \

--in1 CELL_ID_1.fastq.gz --in2 CELL_ID_1.fastq.gz \

--out1 CELL_ID_TRIMMED_1.fastq.gz --out2 CELL_ID_TRIMMED_2.fastq.gz \

--json CELL_ID.json --html CELL_ID.html

*(quantify isoform expression)*

rsem-calculate-expression -p 24 --paired-end \

--star --star-path STAR_PATH --star-gzipped-read-file \

--estimate-rspd --append-names --no-bam-output \

--calc-ci --single-cell-prior \

CELL_ID_TRIMMED_1.fastq.gz CELL_ID_TRIMMED_2.fastq.gz GRCm38 CELL_ID

*(simulate reads)*

rsem-simulate-reads GRCm38 CELL_ID.stat/CELL_ID.model \

CELL_ID.isoforms.results NOISE NUM_READPAIRS OUTDIR

### **Clustering of cells based on isoform reconstruction levels**

We categorize isoform reconstruction levels reported by rnaQUAST as: none (below 50%), partial (at least 50% but below 95%), and full-length (at least 95%). We used 50% and 95% to define the three categories because rnaQUAST only reports isoforms that are ≥50% and ≥95% reconstructed. We constructed a cell-by-isoform matrix of isoform reconstruction levels, which each can be either 0, 50, or 95, denoting the three categories. The matrix was clustered and a heatmap is plotted with the “pheatmap” package in R.

### **Heuristic score for selecting the best candidate extension.**

A heuristic score (*H*) can be calculated to select the best candidate extension based on the following 4 parameters:

1. median *k*-mer count of extension (*c*)
2. number of supporting read *k*-mer pairs (*r*)
3. number of supporting fragment *k*-mer pairs (*f*)
4. number of *k*-mers in extension (*l*)

During fragment sequence reconstruction:

*H* = *c* × *r* / *l*

During transcript sequence reconstruction:

*H* = 0, if *r* = 0 or *f* =0

*H* = *c* × (*r* + *f*) / *l*, otherwise

### **Assembly commands**

**RNA-Bloom v1.2.1 (bulk RNA-seq):**

*(reference-free mode only; “RB”)*

java -jar RNA-Bloom.jar -ntcard -fpr 0.005 -k 25-55:5 -extend \

-t 48 -outdir OUTDIR -rcr \

-l LEFT.fastq -r RIGHT.fastq

*(reference-guided mode only; “RB(ref)”)*

java -jar RNA-Bloom.jar -ntcard -fpr 0.005 -k 25-55:5 -extend \

-t 48 -outdir OUTDIR -rcr \

-l LEFT.fastq -r RIGHT.fastq \

-ref REFERENCE_TRANSCRIPTOME.fasta

**RNA-Bloom v1.2.1 (single-cell RNA-seq):**

*(reference-free mode only; denoted as “RB”)*

java -jar RNA-Bloom.jar -ntcard -fpr 0.005 -k 25 -extend -stratum 01 \

-t 48 -outdir OUTDIR -rcr \

-l LEFT.fastq -r RIGHT.fastq

*(reference-guided mode only; denoted as “RB(ref)”)*

java -jar RNA-Bloom.jar -ntcard -fpr 0.005 -k 25 -extend -stratum 01 \

-t 48 -outdir OUTDIR -rcr \

-l LEFT.fastq -r RIGHT.fastq \

-ref REFERENCE_TRANSCRIPTOME.fasta

*(reference-free pooled assembly mode; denoted as “RB(pool)”)*

java -jar RNA-Bloom.jar -ntcard -fpr 0.005 -k 25 -extend -stratum 01 \

-t 48 -outdir OUTDIR -rcr \

-pool READSLIST.txt

*(reference-guided pooled assembly mode; denoted as “RB(ref,pool)”)*

java -jar RNA-Bloom.jar -ntcard -fpr 0.005 -k 25 -extend -stratum 01 \

-t 48 -outdir OUTDIR -rcr \

-pool READSLIST.txt \

-ref REFERENCE_TRANSCRIPTOME.fasta

**Trans-ABySS v2.0.0:**

transabyss --pe LEFT.fastq RIGHT.fastq --threads 48 -k 25 -c 1 --length 200 \

--outdir OUTDIR

**Trinity v2.5.1:**

Trinity --seqType fq --left LEFT.fastq --right RIGHT.fastq --CPU 48 \

--max_memory 100G --output OUTDIR

**rnaSPAdes v3.11.1:**

python rnaspades.py -t 48 -1 LEFT.fastq -2 RIGHT.fastq -o OUTDIR

**StringTie v2.0.3, HISAT2 v2.1.0, Samtools v1.2, and gffread v0.9.12:**

hisat2 -x HISAT2_INDEX -p 48 --dta -q -1 LEFT.fastq -2 RIGHT.fastq | \

samtools view -Shu - | \

samtools sort -T OUTDIR/tmp -o ALIGNMENT.bam -O bam -

samtools index ALIGNMENT.bam

stringtie ALIGNMENT.bam -p 48 -c 1 -s 1 -o ASSEMBLY.gtf

gffread -w ASSEMBLY.fasta -g REFERENCE_GENOME.fasta ASSEMBLY.gtf

**Scallop v0.10.4 , HISAT2 v2.1.0, Samtools v1.2, and gffread v0.9.12:**

hisat2 -x HISAT2_INDEX -p 48 --dta -q -1 LEFT.fastq -2 RIGHT.fastq | \

samtools view -Shu - | \

samtools sort -T OUTDIR/tmp -o ALIGNMENT.bam -O bam -

samtools index ALIGNMENT.bam

scallop -i ALIGNMENT.bam -o ASSEMBLY.gtf --library_type unstranded \

--min_transcript_length_base 200 --min_single_exon_coverage 1 \

--min_num_hits_in_bundle 1

gffread -w ASSEMBLY.fasta -g REFERENCE_GENOME.fasta ASSEMBLY.gtf
